# Supplementary material for: Single-Step Hydrothermal Synthesis of Biochar from H3PO4-Activated Lettuce Waste for Efficient Adsorption of Cd(II) in Aqueous Solution
Source: MDPI journal article supplement (doi:10.3390/molecules27010269), 2022-01-02
Supplement: s1 [file s1]

## Supporting Information

### Single-step Hydrothermal Synthesis of Biochar from H<sub>3</sub>PO<sub>4</sub>-Activated Lettuce Waste for Efficient Adsorption of Cd(II) in Aqueous Solution

Quyun Chen <sup>a</sup>, Tian Cheng Zhang,<sup>b</sup> Like Ouyang,<sup>a</sup> Shaojun Yuan <sup>a,\*</sup>

<sup>a</sup> Low-carbon Technology & Chemical Reaction Engineering Lab, College of Chemical Engineering, Sichuan University, Chengdu 610065, P. R. China.

<sup>b</sup> Civil & Environmental Engineering Department, University of Nebraska-Lincoln, Omaha, NE 68182-0178, USA

\*Corresponding author: E-mail: [ysj@scu.edu.cn](mailto:ysj@scu.edu.cn); Tel/Fax: +86-28-85405201

#### S1 Supplementary Experimental

##### S1.1 Determination of optimal preparation conditions of different types of biochars. In

this study, different types of the biochars were prepared under different preparation conditions, as shown in detail in Tables S1 to S3. Batch adsorption experiments were conducted to evaluate the effect of activator concentration, hydrothermal reaction time and hydrothermal reaction temperature on the adsorption capacities of as-prepared biochar toward Cd(II) ions. The batch experimental conditions were controlled as follows: pH = 6 ± 0.05, T = 25 °C, C<sub>0</sub> = 100 mg·L<sup>-1</sup>, m = 0.05 g, V = 0.05 L, t = 100 min.

The determination of optimal preparation conditions was performed as shown in Tables S1-S3. To use H<sub>3</sub>PO<sub>4</sub> solution as the activation agent, the optimal hydrothermal time at 2 h was determined as shown in Fig. 1a (see Table S1), the optimal concentration of H<sub>3</sub>PO<sub>4</sub> was determined at 1.3 mol·L<sup>-1</sup> as shown in Fig. 1b (see Table 2), and the optimal hydrothermal temperature was determined at 200 °C as shown in Fig. 1c (see Table 3) for the biochar.

**S1.2 Effect of solution pH.** In the experiment, the pH value of the solution was adjusted with 0.1 M HNO<sub>3</sub> and 0.1 M NaOH, respectively. Experimental conditions:  $C_0 = 100 \text{ mg}\cdot\text{L}^{-1}$ ,  $m = 0.05 \text{ g}$ ,  $V = 0.05 \text{ L}$ ,  $T = 25 \pm 1 \text{ }^\circ\text{C}$ , and  $t = 100 \text{ min}$ .

**S1.3 Effect of Cd(II) initial concentration.** Changed the Cd(II) initial concentrations as 40–1100  $\text{mg}\cdot\text{L}^{-1}$ . Experimental conditions:  $\text{pH} = 6.0 \pm 0.05$ ,  $m = 0.05 \text{ g}$ ,  $V = 0.05 \text{ L}$ ,  $t = 100 \text{ min}$  and  $T = 25 \pm 1 \text{ }^\circ\text{C}$ .

**S1.4 Effect of LBC-P-1.3-200-2 dosage.** To test of the effect of the LBC-P-1.3-200-2 dosage, each of the different adsorbent dosages was added to 50 mL of the Cd(II) solution. Experimental conditions:  $C_0 = 100 \text{ mg}\cdot\text{L}^{-1}$ ,  $\text{pH} = 6.0 \pm 0.05$ ,  $t = 100 \text{ min}$  and  $T = 25 \pm 1 \text{ }^\circ\text{C}$ .

**S1.5 Effect of existed heavy metal ions.** Applicability of LBC-P-1.3-200-2 for Cd(II), Cu(II), Zn(II) and Pb(II) removal were studied using batch experiments in a reaction mixture of 0.05 g of adsorbent and 0.05 L of metal solution containing each of the heavy metals at  $5 \text{ mmol}\cdot\text{L}^{-1}$ . The result was shown in Fig. S3a. Experimental conditions:  $C_0 = 5 \text{ mmol}\cdot\text{L}^{-1}$ ,  $m = 0.05 \text{ g}$ ,  $V = 0.05 \text{ L}$ ,  $\text{pH} = 6.0 \pm 0.05$ ,  $t = 100 \text{ min}$  and  $T = 25 \pm 1 \text{ }^\circ\text{C}$ .

**S1.6 Adsorption kinetics.** The time that reach adsorption equilibrium for the adsorption experiment was determined by kinetic tests with Cd(II) at  $t = 0\text{--}100 \text{ min}$  using different types of biochar at the test conditions of:  $C_0 = 100 \text{ mg}\cdot\text{L}^{-1}$ ,  $\text{pH} = 6.0 \pm 0.05$ ,  $m = 0.05 \text{ g}$ ,  $V = 0.05 \text{ L}$ , and  $T = 25 \pm 1 \text{ }^\circ\text{C}$ . In order to study the effect to remove other heavy metal ions, adsorption kinetic studies were carried out under optimal conditions for Cd(II), Cu(II), Zn(II) and Pb(II) with LBC-P-1.3-200-2 at conditions of:  $\text{pH} = 6 \pm 0.05$ ,  $T = 25 \pm 1 \text{ }^\circ\text{C}$ ,  $C_0 = 5 \text{ mmol}\cdot\text{L}^{-1}$ ,  $m = 0.05 \text{ g}$ ,  $V = 0.05 \text{ L}$ ,  $t = 0\text{--}100 \text{ min}$ .

The pseudo-first-order (PFO) and pseudo-second-order (PSO) kinetic models are utilized to seek the underlying mechanism of the adsorption process. Lagergren<sup>1</sup> proposed that the

pseudo-first order model can be used to describe the liquid-solid phase adsorption system, while Ho and McKay<sup>2</sup> proposed that the pseudo-second-order model describes a kinetic process of the adsorption of divalent metal ions on solid adsorbents. The data of kinetic studies were fitted with the PFO model<sup>1</sup> (Eq. 1) and the PSO model<sup>2</sup> (Eq. 2):

$$c = c_0 \cdot e^{(-k_f t)} \quad (1)$$

$$q_t = \frac{k_s q_e^2 \cdot t}{1 + k_s \cdot q_e \cdot t} \quad (2)$$

where  $q_e$  and  $q_t$  ( $\text{mg} \cdot \text{g}^{-1}$ ) are the amounts of heavy metals adsorbed at equilibrium and at time  $t$  (min);  $k_f$  ( $\text{min}^{-1}$ ) is the rate constant of the pseudo-first-order model;  $k_s$  ( $\text{g} \cdot \text{mg}^{-1} \cdot \text{min}^{-1}$ ) is the rate constant of pseudo-second order model.

The Weber-Morris model was commonly used to confirm whether the intraparticle diffusion was the rate-controlling step, while the Boyd model was applicable to determine the contribution of the boundary layer or film diffusion. The data of kinetic studies were fitted with the Weber-Morris intra-particle diffusion model<sup>3</sup> (Eq. 3), and the Boyd model<sup>4</sup> (Eq. 4):

$$q_t = k_{pi} t^{\frac{1}{2}} + C \quad (3)$$

$$-\ln(1-F) = k_f \cdot t \quad (4)$$

where  $k_{pi}$  ( $\text{mg} \cdot \text{g}^{-1} \cdot \text{min}^{-0.5}$ ) is the diffusion rate constant of intra-particle diffusion kinetic model;  $F$  is the fractional attainment of equilibrium calculated from the ratio of  $q_t/q_e$ ; and  $k_f$  is the film diffusion rate constant ( $\text{min}^{-1}$ ).

**S1.7 Adsorption isotherms.** Adsorption isotherms studies were carried out under optimal conditions for Cd(II) with LBC-P-1.3-200-2 at conditions of: pH =  $6 \pm 0.05$ , m = 0.05 g, V = 0.05 L, t = 100 min, T = 15–45 °C and  $C_0 = 40\text{--}1100 \text{ mg} \cdot \text{L}^{-1}$ . The adsorption isotherms are frequently fitted by different isotherm models, such as Langmuir, Freundlich, Temkin and Sips isotherm models:

$$q_e = \frac{K_L \cdot q_m \cdot C_e}{1 + K_L \cdot C_e} \quad (5)$$

$$q_e = K_F C_e^{1/n} \quad (6)$$

$$q_e = A \cdot \ln K_T + A \cdot \ln C_e \quad (7)$$

$$q_e = \frac{q_m \cdot K_S \cdot C_e^{1/n_s}}{1 + K_S \cdot C_e^{1/n_s}} \quad (8)$$

where  $C_e$  ( $\text{mg} \cdot \text{L}^{-1}$ ) is the equilibrium concentration after adsorption;  $q_e$  ( $\text{mg} \cdot \text{g}^{-1}$ ) is the adsorption capacity for Cd(II) adsorbed at equilibrium;  $K_L$  ( $\text{L} \cdot \text{mg}^{-1}$ ) is the Langmuir adsorption constant;  $q_m$  ( $\text{mg} \cdot \text{g}^{-1}$ ) is the maximum adsorption capacity calculated by the Langmuir model;  $K_F$  and  $n$  are Freundlich constants;  $n$  represents the degree of favorable adsorption process;  $K_F$  ( $\text{mg}^{1-1/n} \cdot \text{L}^{1/n} \cdot \text{g}^{-1}$ ) is the adsorption capacity of the adsorbent;  $A = RT / b_t$ , where  $R$  ( $8.314 \text{ J} \cdot \text{mol}^{-1} \cdot \text{K}^{-1}$ ) is the gas constant;  $T$  (K) is the absolute temperature;  $b_t$  is the Temkin constant related to the heat of adsorption ( $\text{kJ} \cdot \text{mol}^{-1}$ );  $K_S$  ( $\text{L} \cdot \text{g}^{-1}$ ) is the Sips model constant;  $n_s$  is the Sips model index.

**S1.8 Adsorption thermodynamics.** Adsorption thermodynamics studies were carried out under optimal conditions for Cd(II) with LBC-P-1.3-200-2 at conditions of: pH =  $6 \pm 0.05$ , m = 0.05 g, V = 0.05 L, t = 100 min,  $C_0 = 100 \text{ mg} \cdot \text{L}^{-1}$  and T = 15–45 °C. The changes in enthalpy ( $\Delta H^\circ$ ), entropy ( $\Delta S^\circ$ ) and Gibbs free energy ( $\Delta G^\circ$ ) were calculated with Eqs. (9–11)<sup>5</sup> to determine the thermodynamic properties:

$$K = \frac{q_e}{C_e} \quad (9)$$

$$\Delta G^\circ = -RT \ln K \quad (10)$$

$$\ln K = \frac{\Delta S^\circ}{R} - \frac{\Delta H^\circ}{RT} \quad (11)$$

where  $K$  ( $\text{L} \cdot \text{g}^{-1}$ ) is the equilibrium constant;  $q_e$  ( $\text{mg} \cdot \text{g}^{-1}$ ) is the adsorption capacity;  $C_e$  ( $\text{mg} \cdot \text{L}^{-1}$ ) is the equilibrium Cd(II) concentration;  $R$  ( $8.314 \text{ J} \cdot \text{mol}^{-1} \cdot \text{K}^{-1}$ ) is the general gas constant; and  $T$  (K) is the temperature.

## S2 Supplementary Results

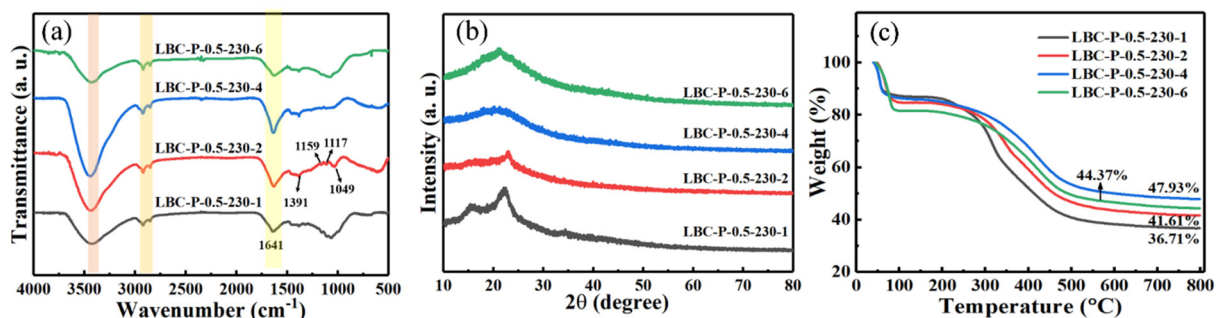

**Figure S1.** (a) FT-IR spectra, (b) XRD patterns, and (c) TG curves of LBC-P-0.5-230- $X$  ( $X = 1, 2, 4, 6$  h) samples at different reaction time.

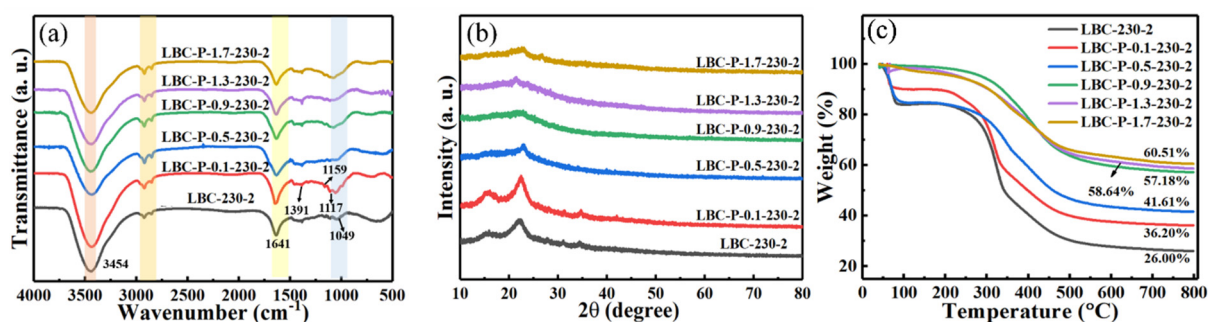

**Figure S2.** (a) FT-IR spectra, (b) XRD patterns, and (c) TG curves of LBC-P- $X$ -230-2 ( $X = 0, 0.1, 0.5, 0.9, 1.3, 1.7$  mol·L $^{-1}$ ) samples with different activator concentration.

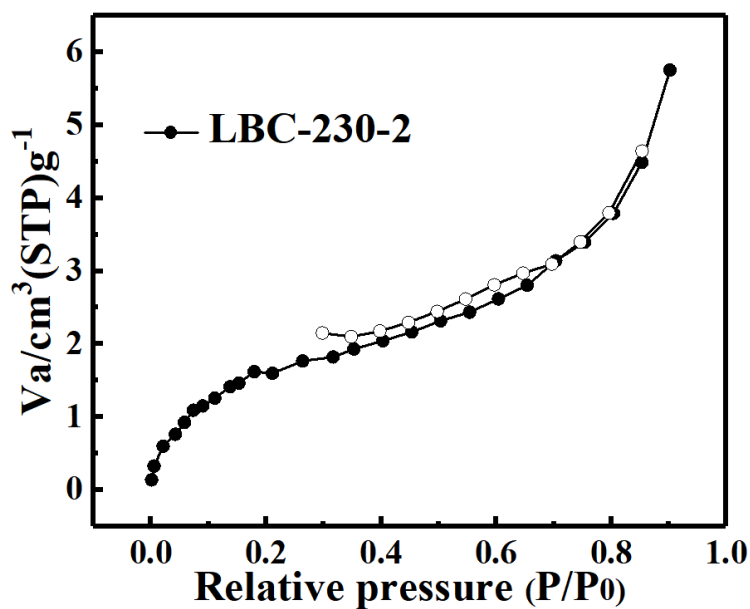

**Figure S3.** The  $\text{N}_2$  adsorption-desorption isotherms of LBC-230-2 obtained without  $\text{H}_3\text{PO}_4$  activation during hydrothermal synthesis.

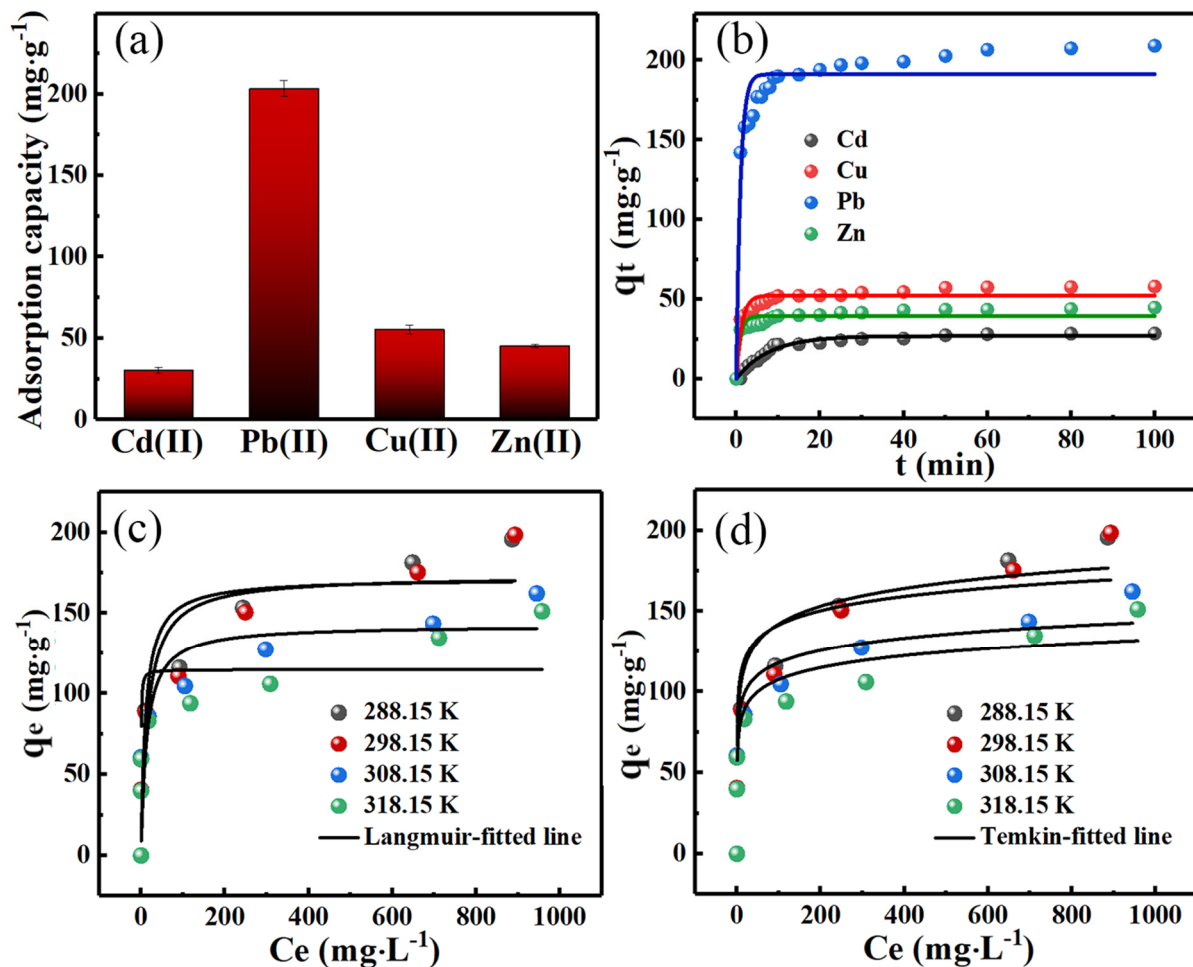

**Figure S4.** (a) Adsorption capacity of LBC-P-1.3-200-2 for Cd(II), Cu(II), Zn(II), and Pb(II). (b) Adsorption kinetics of LBC-P-1.3-200-2 for Cd(II), Cu(II), Zn(II), and Pb(II) and fitting curves of the pseudo-first order model. (c) Langmuir- and (d) Temkin-model fitted adsorption isotherms of Cd(II) ions on the LBC-P-1.3-200-2 at different adsorption temperature. s of 288.15, 298.15, 308.15 and 318.15K. Experimental conditions: pH = 6.0,  $C_0 = 100 \text{ mg}\cdot\text{L}^{-1}$ ,  $m = 0.05 \text{ g}$ ,  $V = 0.05 \text{ L}$ ,  $t = 100 \text{ min}$ .

### S3 Supplementary Tables

**Table S1.** Different reaction time for hydrothermal synthesis of H<sub>3</sub>PO<sub>4</sub>-activated biochars

| Samples         | Reaction time | Activator types                | Activator concentration | Reaction temperature |
|-----------------|---------------|--------------------------------|-------------------------|----------------------|
| LBC-P-0.5-230-1 | 1 h           | H <sub>3</sub> PO <sub>4</sub> | 0.5 mol·L <sup>-1</sup> | 230 °C               |
| LBC-P-0.5-230-2 | 2 h           | H <sub>3</sub> PO <sub>4</sub> | 0.5 mol·L <sup>-1</sup> | 230 °C               |
| LBC-P-0.5-230-4 | 4 h           | H <sub>3</sub> PO <sub>4</sub> | 0.5 mol·L <sup>-1</sup> | 230 °C               |
| LBC-P-0.5-230-6 | 6 h           | H <sub>3</sub> PO <sub>4</sub> | 0.5 mol·L <sup>-1</sup> | 230 °C               |

**Table S2.** Different activator concentrations for hydrothermal synthesis of H<sub>3</sub>PO<sub>4</sub>-activated biochars

| Samples         | Reaction time | Activator types                | Activator concentration | Reaction temperature |
|-----------------|---------------|--------------------------------|-------------------------|----------------------|
| LBC-P-0.1-230-2 | 2 h           | H <sub>3</sub> PO <sub>4</sub> | 0.1 mol·L <sup>-1</sup> | 230 °C               |
| LBC-P-0.5-230-2 | 2 h           | H <sub>3</sub> PO <sub>4</sub> | 0.5 mol·L <sup>-1</sup> | 230 °C               |
| LBC-P-0.9-230-2 | 2 h           | H <sub>3</sub> PO <sub>4</sub> | 0.9 mol·L <sup>-1</sup> | 230 °C               |
| LBC-P-1.3-230-2 | 2 h           | H <sub>3</sub> PO <sub>4</sub> | 1.3 mol·L <sup>-1</sup> | 230 °C               |
| LBC-P-1.7-230-2 | 2 h           | H <sub>3</sub> PO <sub>4</sub> | 1.7 mol·L <sup>-1</sup> | 230 °C               |

**Table S3.** Different reaction temperatures for hydrothermal synthesis of H<sub>3</sub>PO<sub>4</sub>-activated biochars

| Samples         | Reaction time | Activator types                | Activator concentration | Reaction temperature |
|-----------------|---------------|--------------------------------|-------------------------|----------------------|
| LBC-P-1.3-170-2 | 2 h           | H <sub>3</sub> PO <sub>4</sub> | 1.3 mol·L <sup>-1</sup> | 170 °C               |
| LBC-P-1.3-200-2 | 2 h           | H <sub>3</sub> PO <sub>4</sub> | 1.3 mol·L <sup>-1</sup> | 200 °C               |
| LBC-P-1.3-230-2 | 2 h           | H <sub>3</sub> PO <sub>4</sub> | 1.3 mol·L <sup>-1</sup> | 230 °C               |
| LBC-P-1.3-260-2 | 2 h           | H <sub>3</sub> PO <sub>4</sub> | 1.3 mol·L <sup>-1</sup> | 260 °C               |

**Table S4.** BET characterization results of different biochars obtained without and with the addition of H<sub>3</sub>PO<sub>4</sub> activator

| Sample          | S <sub>BET</sub> [m <sup>2</sup> ·g <sup>-1</sup> ] | V <sub>total</sub> [cm <sup>3</sup> ·g <sup>-1</sup> ] | D [nm] |
|-----------------|-----------------------------------------------------|--------------------------------------------------------|--------|
| LBC-230-2       | 6.96                                                | 0.009                                                  | 5.12   |
| LBC-P-1.3-200-2 | 5.20                                                | 0.018                                                  | 6.20   |

**Table S5.** The elemental content distribution of LBC-P-1.3-200-2 in XPS spectra

| Name            | C 1s   | O 1s   | N 1s  | P 2p  |
|-----------------|--------|--------|-------|-------|
| LBC-P-1.3-200-2 | 79.19% | 17.38% | 2.38% | 0.62% |

**Table S6.** Fitted kinetic parameters of different heavy metal ions adsorbed on the LBC-P-1.3-200-2 sample.

| Kinetic Modles                    | Parameters                                     | Cd(II) | Cu(II) | Pb(II) | Zn(II) |
|-----------------------------------|------------------------------------------------|--------|--------|--------|--------|
| Pseudo-first-order<br>parameters  | $q_{e,exp}$ (mg·g <sup>-1</sup> )              | 28.50  | 57.98  | 209.0  | 44.71  |
|                                   | $q_{e,cal}$ (mg·g <sup>-1</sup> )              | 26.94  | 52.34  | 191.2  | 39.51  |
|                                   | $k_f$ (min <sup>-1</sup> )                     | 0.128  | 0.774  | 1.007  | 1.035  |
|                                   | $R^2$                                          | 0.971  | 0.882  | 0.916  | 0.843  |
| Pseudo-second-order<br>parameters | $q_{e,exp}$ (mg·g <sup>-1</sup> )              | 28.50  | 57.98  | 209.0  | 44.71  |
|                                   | $q_{e,cal}$ (mg·g <sup>-1</sup> )              | 31.00  | 55.58  | 201.3  | 42.14  |
|                                   | $k_s$ (g·mg <sup>-1</sup> ·min <sup>-1</sup> ) | 0.540  | 1.477  | 1.771  | 1.933  |
|                                   | $R^2$                                          | 0.969  | 0.967  | 0.981  | 0.942  |

## References

1. Lagergren, S. K., About the theory of so-called adsorption of soluble substances. *Sven. Vetenskapsakad. Handlingar* **1898**, 24, 1-39.
2. Ho, Y. S.; McKay, G., Pseudo-second order model for sorption processes. *Process biochemistry* (1991) **1999**, 34 (5), 451-465.
3. Weber Morris, W., Kinetics of adsorption on carbon from solution. *Proc. Amer. Soc. civ. Engrs* **1963**, 89, 31-59,3483.
4. Yuan, S.; Zhang, P.; Yang, Z.; Lv, L.; Tang, S.; Liang, B., Successive grafting of poly(hydroxyethyl methacrylate) brushes and melamine onto chitosan microspheres for effective Cu(II) uptake. *Int J Biol Macromol* **2018**, 109, 287-302.
5. Ghorbani, F.; Kamari, S.; Zamani, S.; Akbari, S.; Salehi, M., Optimization and modeling of aqueous Cr(VI) adsorption onto activated carbon prepared from sugar beet bagasse agricultural waste by application of response surface methodology. *Surfaces and Interfaces* **2020**, 18.
